# Supplementary material for: SARS-CoV-2 Rapid Antigen Test Based on a New Anti-Nucleocapsid Protein Monoclonal Antibody: Development and Real-Time Validation
Source: MDPI journal article supplement (doi:10.3390/microorganisms11102422), 2023-09-28
Supplement: s1 [file s1]

## Supplementary Materials

Table S1

| Primer ID          | Sequence (5' - 3')          |
|--------------------|-----------------------------|
| nCoV-2019_75_LEFT  | AGAGTCCAACCAACAGAATCTATTGT  |
| nCoV-2019_77_RIGHT | CAGCCCCTATTAAACAGCCTGC      |
| CTR1               | CATATTGCAACAAAAGATTGCTGCATT |

Figure S1

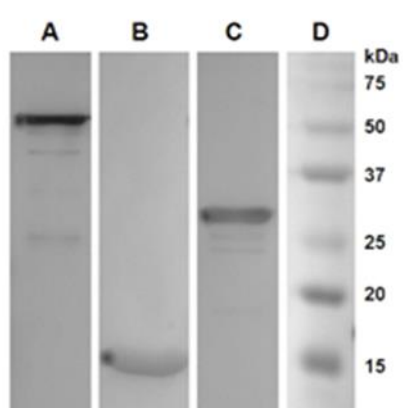

Figure S2

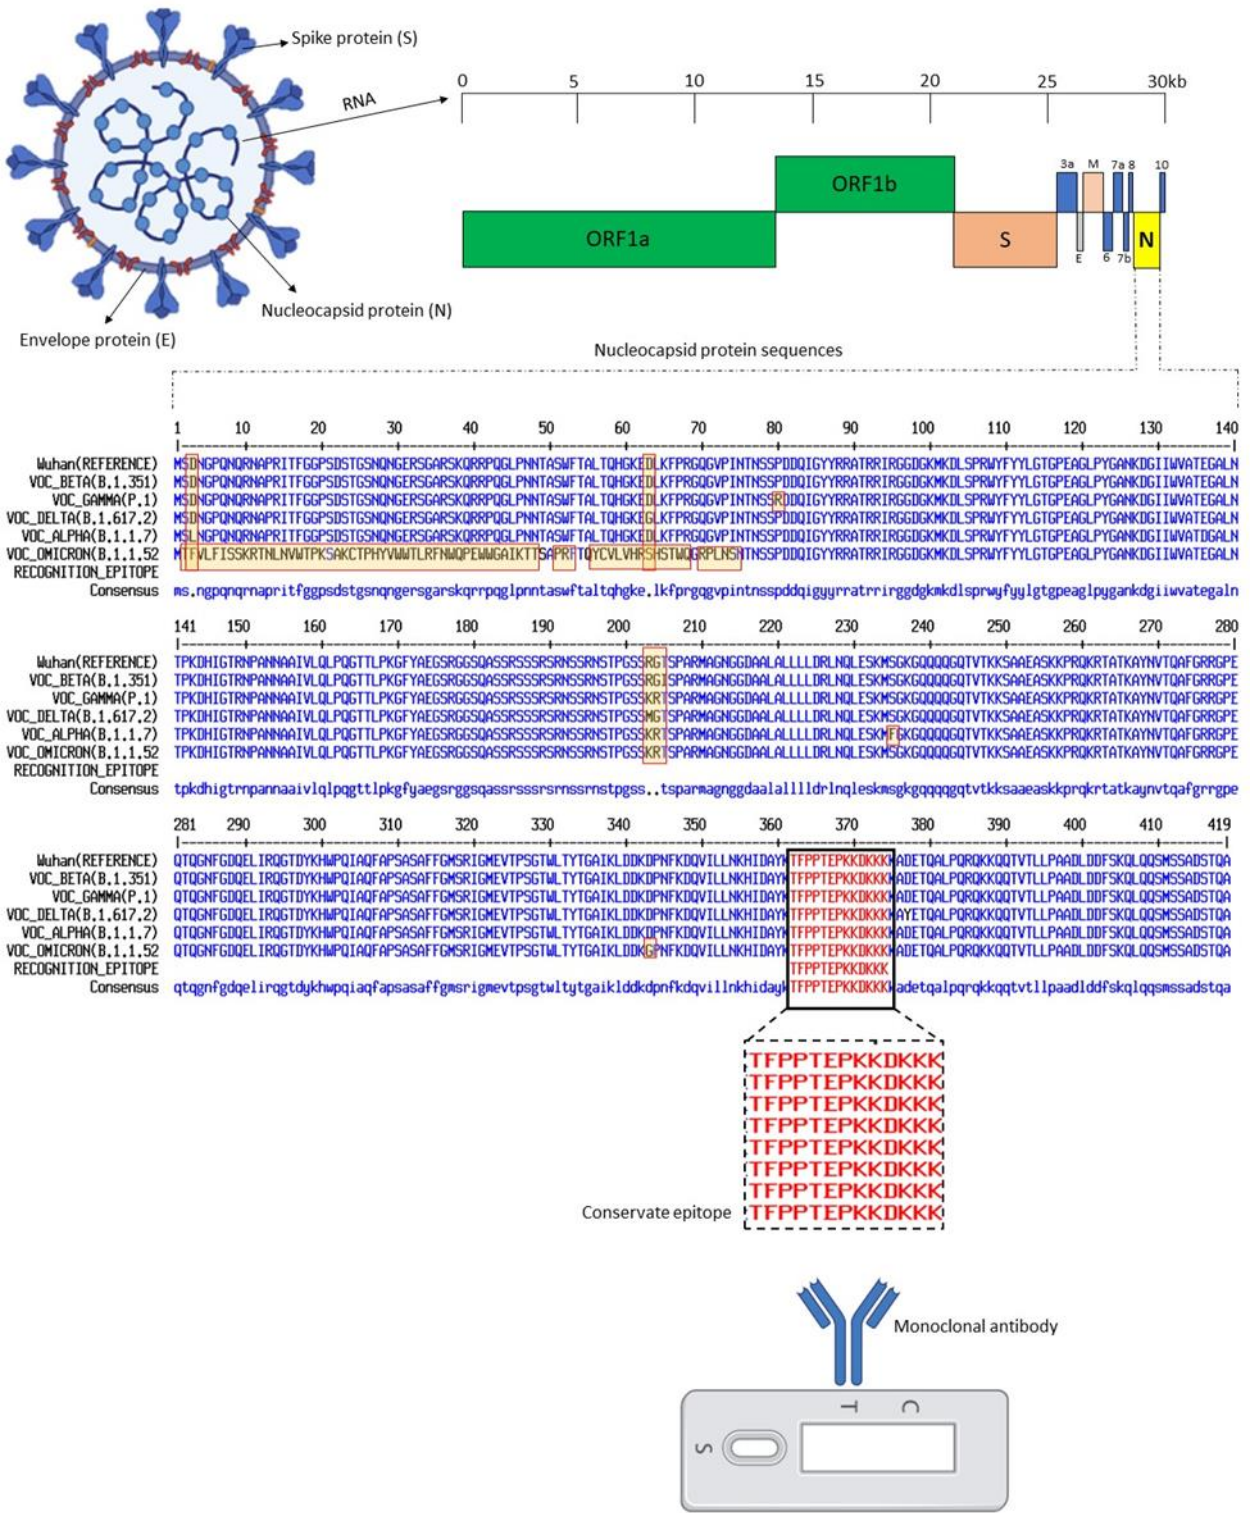

Figure S3

[A]

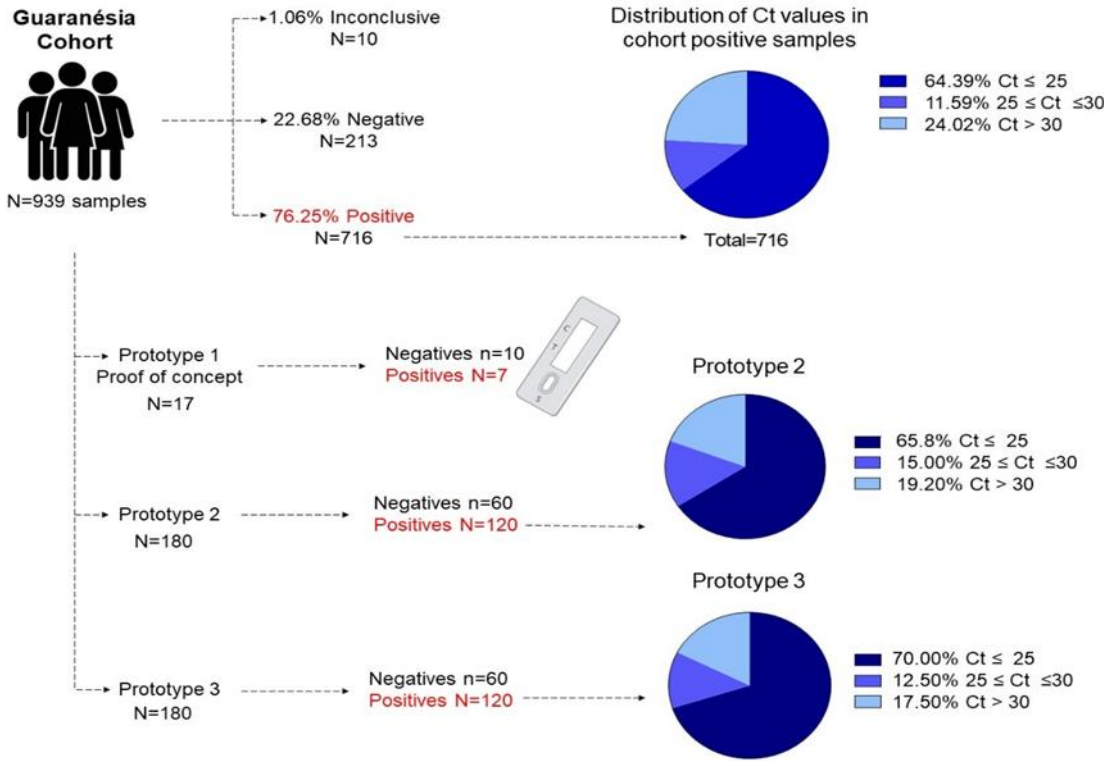

[B]

**Belo Horizonte**

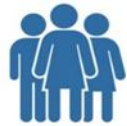

**Follow-up**

38 participants  
112 positive samples  
by RT-qPCR

0-3  
Days

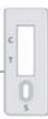

N = 25 (22.3%)

4-7  
Days

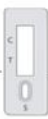

N = 45 (40.2%)

>7  
Days

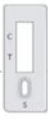

N = 42 (37.5%)
